# Supplementary material
Source: Royal Society of Chemistry journal article supplement (doi:10.1039/d6an00377j)
Supplement: d6an00377j1.pdf [file d6an00377j1.pdf]

## *Supporting Information*

### **Supplementary methods**

#### **UPLC-MS/MS analysis**

We studied the LC-MS/MS detection methods for cadusafos, chlorfenvinphos, chlorpyrifos methyl, coumaphos, disulfoton sulfoxide, edifenphos, EPN, ethion, ethoprophos, fenamiphos sulfone, fenamiphos sulfoxide, fensulfothion, fensulfothion sulfone, fenthion sulfone, fenthion sulfoxide, heptenophos, isazofos, malathion, methiocarb sulfoxide, parathion, phenthoate, phorate sulfoxide, phosalone, phoxim, profenofos, pyridaphenthion, quinalphos, sulfotep, terbufos sulfoxide and triazophos. Figure S1 shows the chromatogram of phenylpyrazoles under simultaneous positive and negative multiple reaction monitoring mode (MRM). Table S1 shows the chromatographic conditions for the detection of organophosphate pesticides.

The mass spectrometer used a Z-spray ESI. In positive mode, the MS parameters were the following: capillary voltage, 3.00 kV; source temperature, 150 °C; desolvation temperature, 300°C; desolvation gas flow, 650 L/h; cone gas flow, 150 L/h; and collision gas 0.16 mL/min. In negative mode, the MS parameters were the following, capillary voltage, 2.80 kV; source temperature, 150 °C; desolvation temperature, 300 °C; desolvation gas flow, 600 L/h; cone gas flow, 150 L/h; and collision gas, 0.15 mL/min.

## Supplementary figures

STD-20ppb  
20251017-4

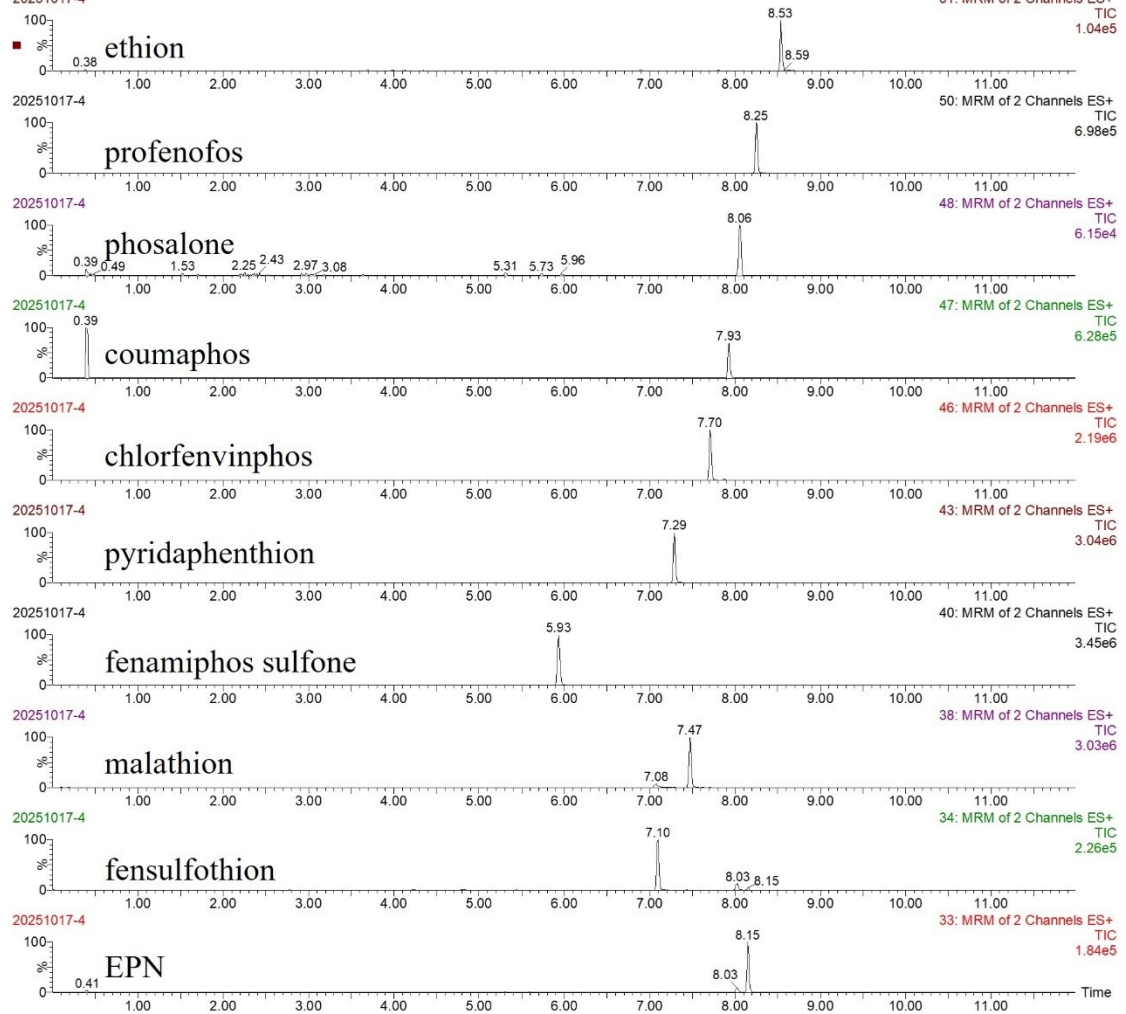

STD-20ppb

20251017-4

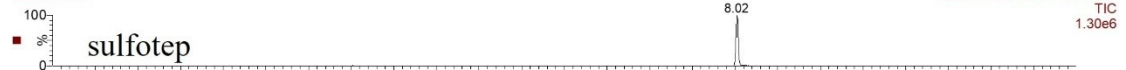

20251017-4

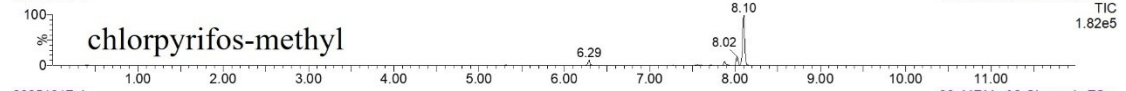

20251017-4

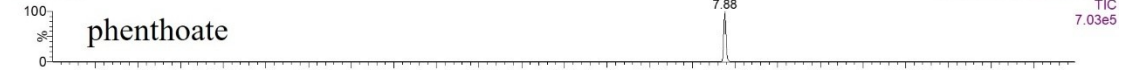

20251017-4

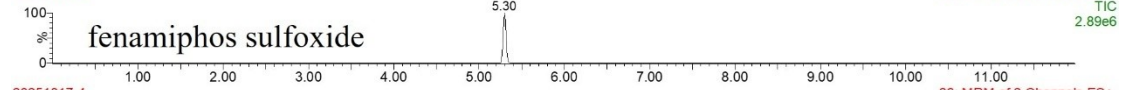

20251017-4

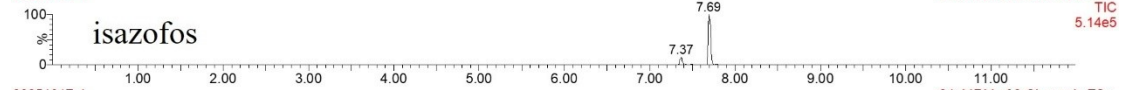

20251017-4

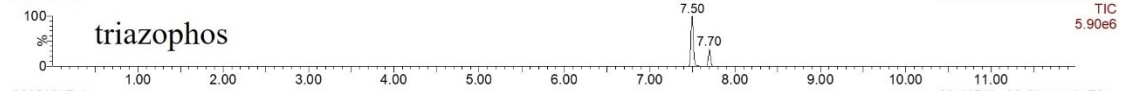

20251017-4

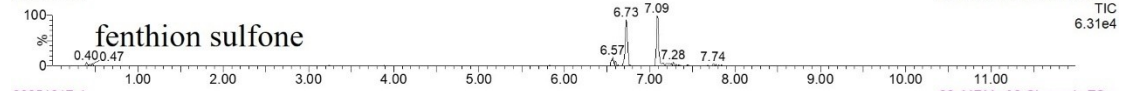

20251017-4

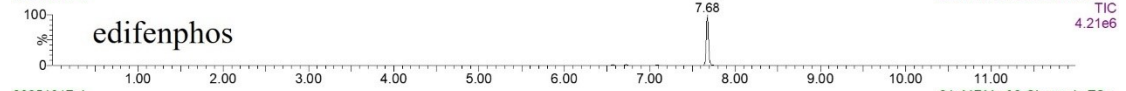

20251017-4

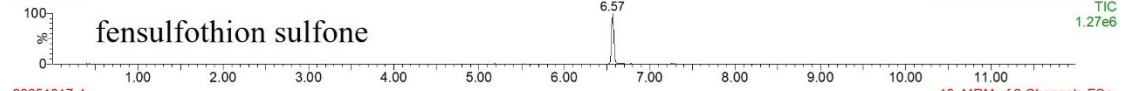

20251017-4

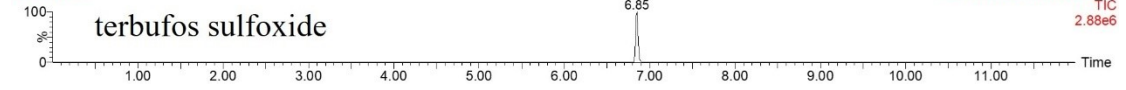

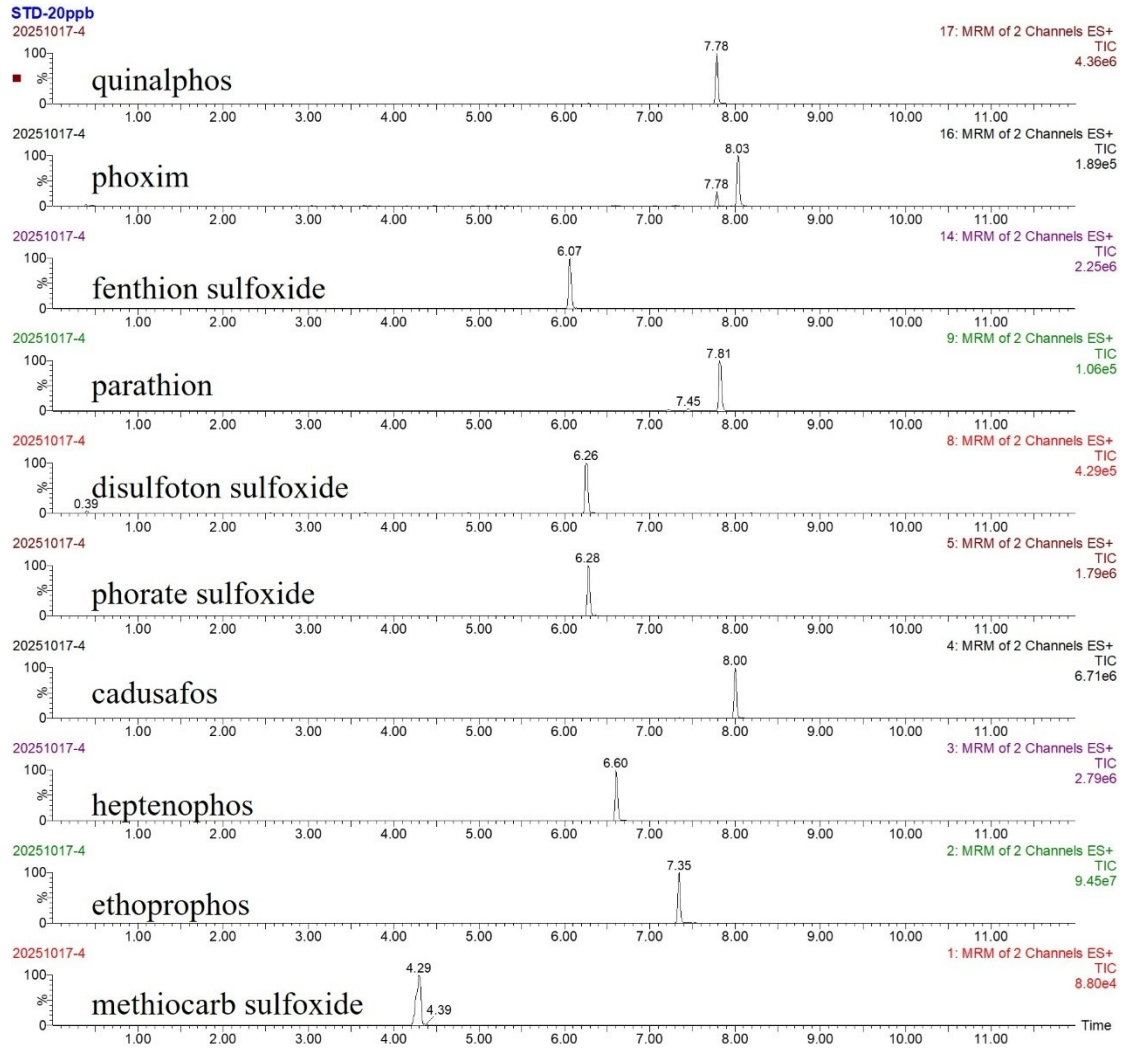

**Figure S1.** UPLC-MS/MS Chromatograms of MRM Modes for Thirty Organophosphorus Pesticides.

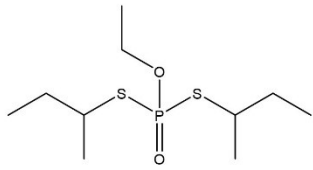

Cadusafos

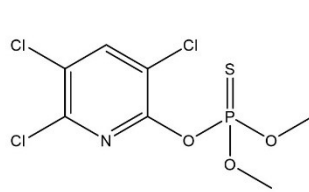

Chlorpyrifos methyl

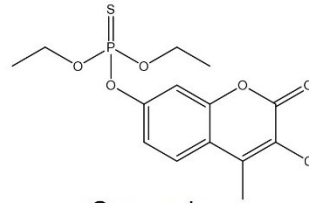

Coumaphos

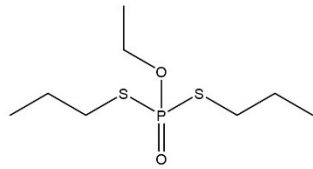

Ethoprophos

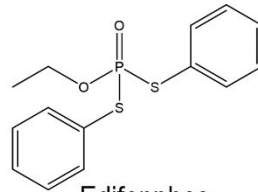

Edifenphos

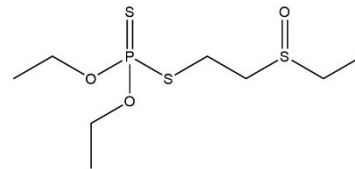

Disulfoton sulfoxide

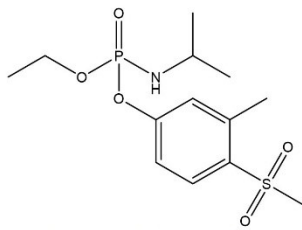

Fenamiphos sulfone

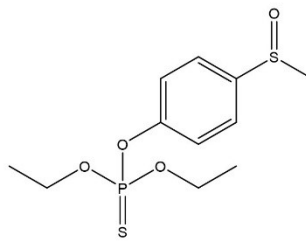

Fensulfotion

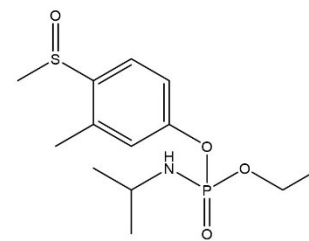

Fenamiphos sulfoxide

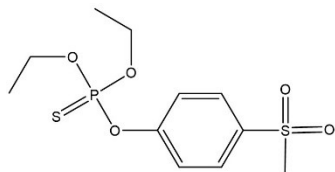

Fensulfotion sulfone

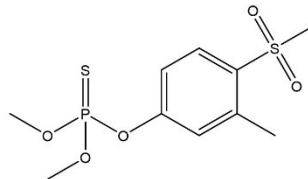

Fenthion sulfone

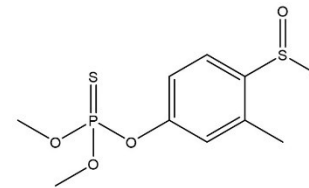

Fenthion sulfoxide

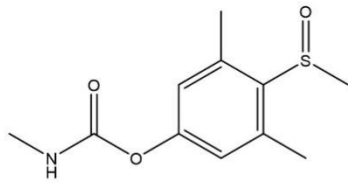

Methiocarb sulfoxide

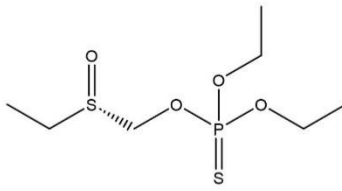

Phorate sulfoxide

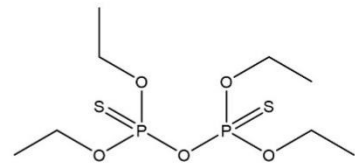

Sulfotep

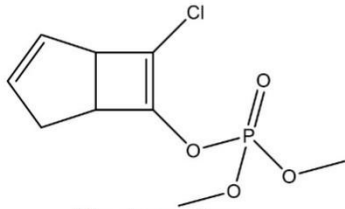

Heptenophos

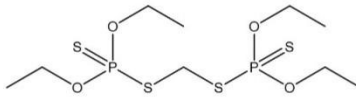

Ethion

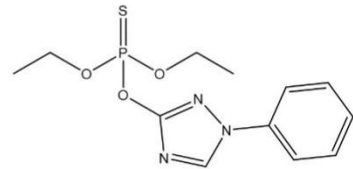

Triazophos

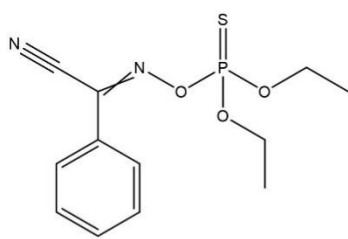

Phoxim

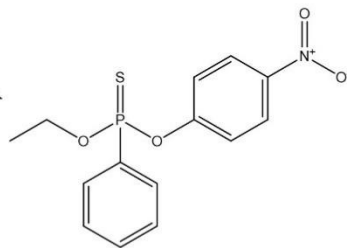

EPN

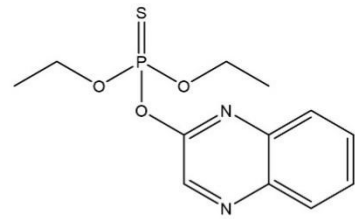

Quinalphos

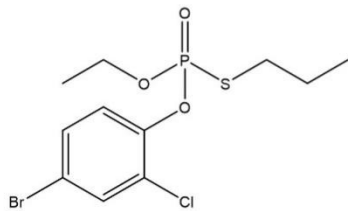

Profenofos

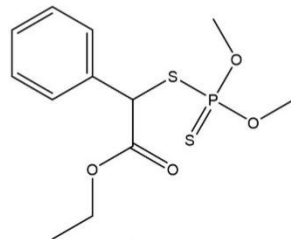

Phenthoate

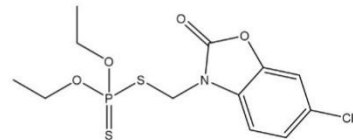

Phosalone

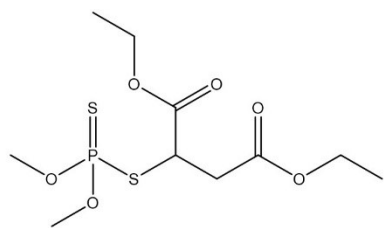

Malathion

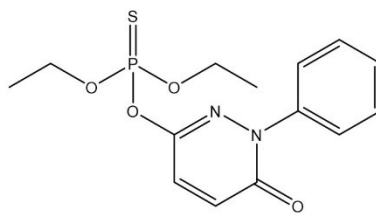

Pyridaphenthion

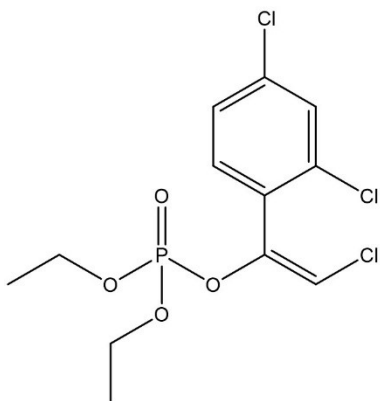

Chlorfenvinphos

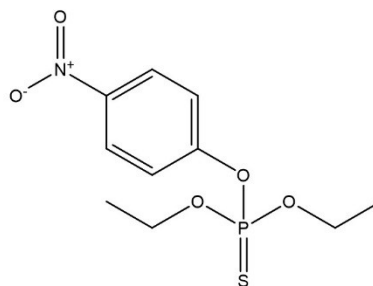

Parathion

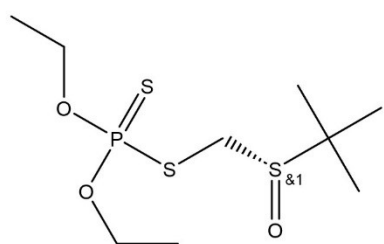

Terbufos sulfoxide

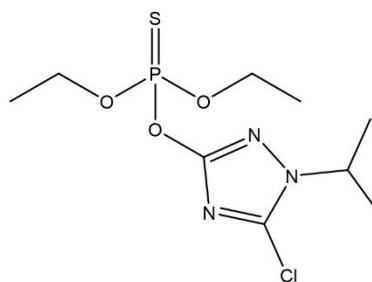

Isazofos

**Figure S2.** Chemical Structures of Thirty Organophosphorus Pesticides.

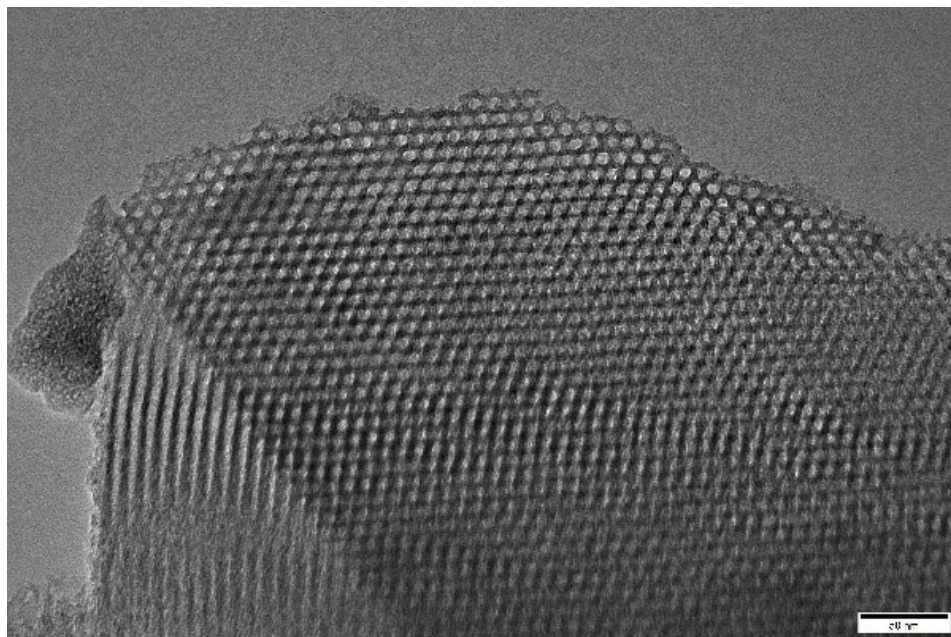

**Figure S3.** TEM image of SBA-15.

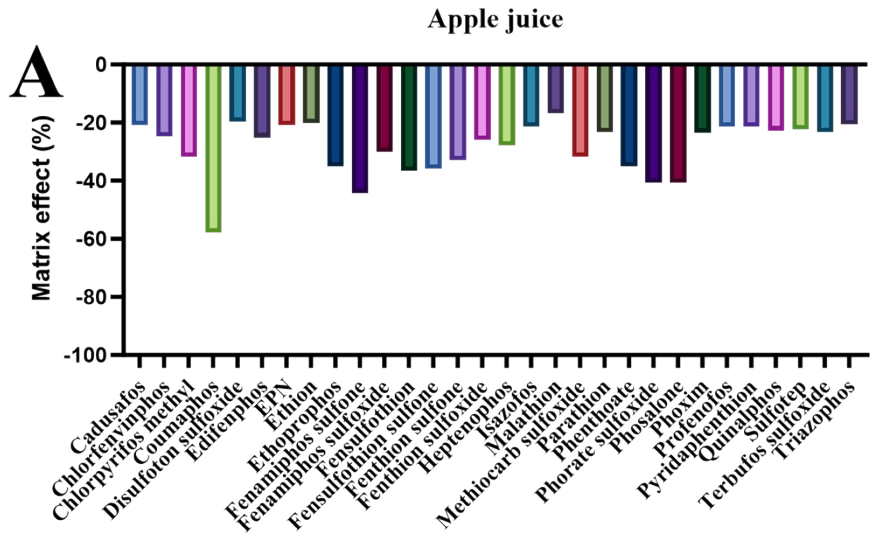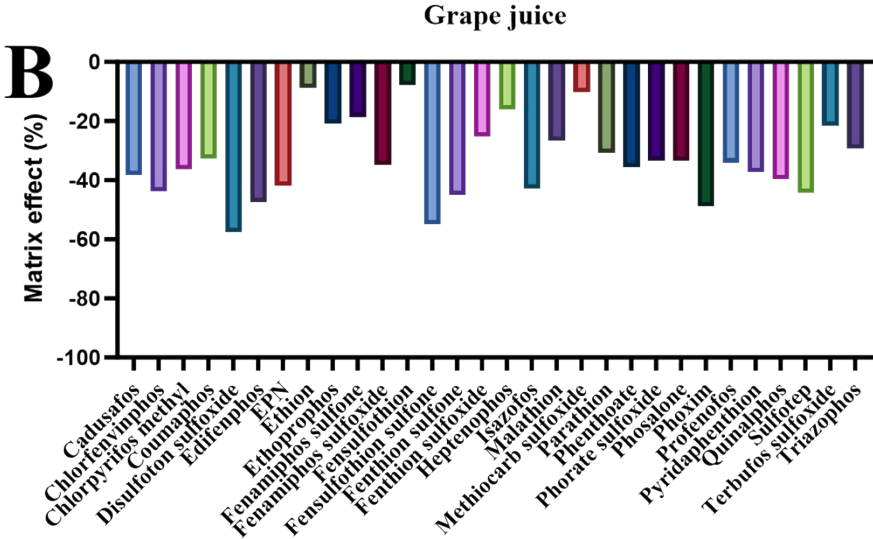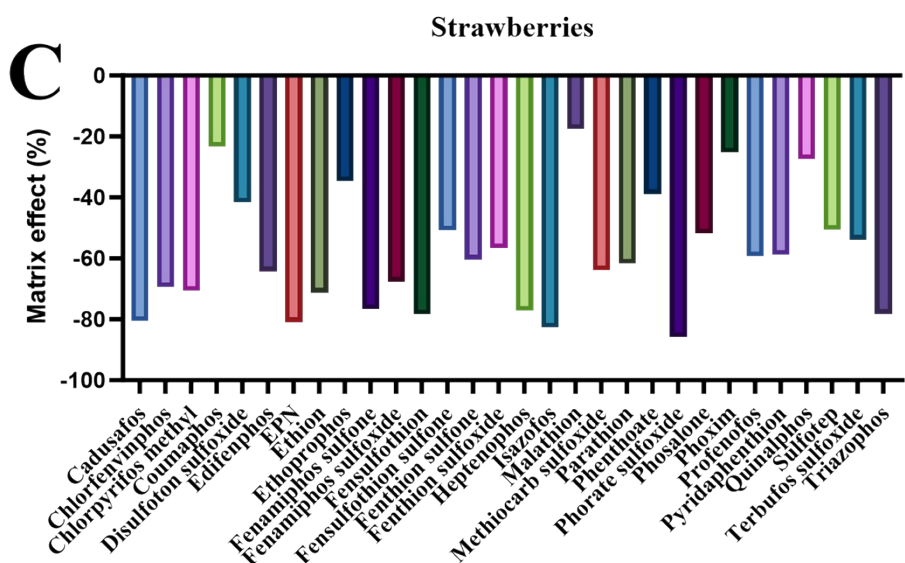

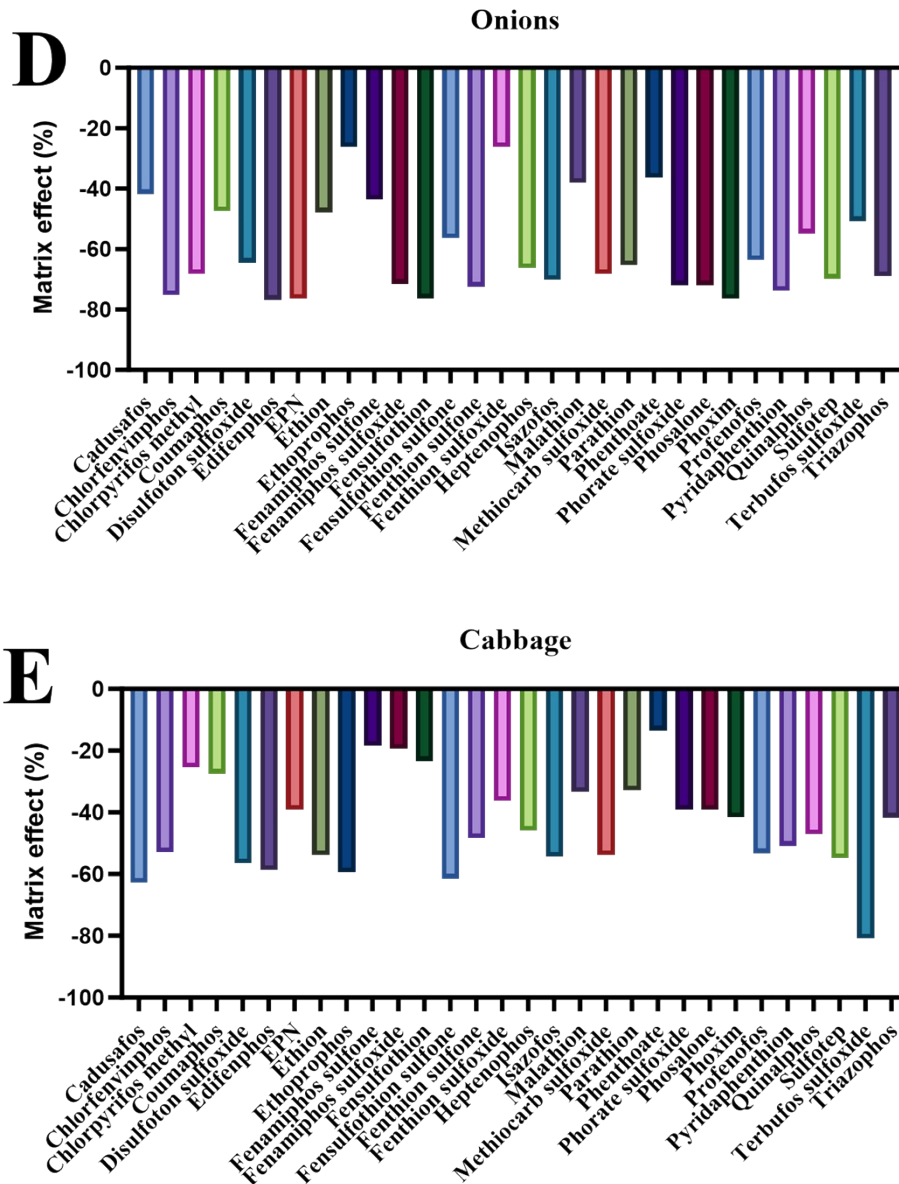

**Figure S4.** Matrix effects of thirty organophosphate pesticides in five types of food matrices. (A) Apple juice, (B) Grape juice, (C) Strawberries, (D) Onions, (E) Cabbage.

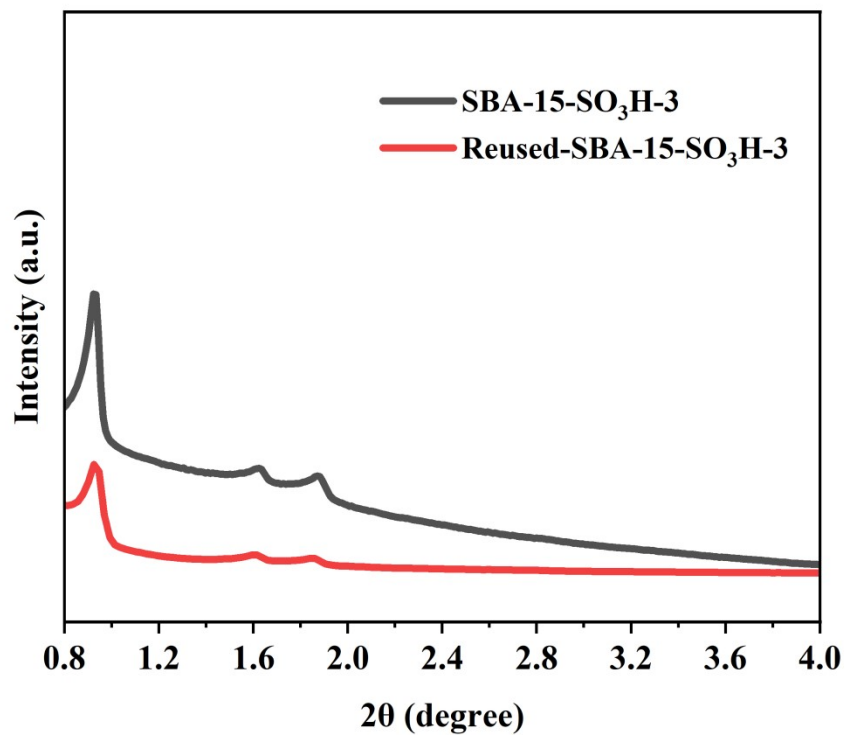

**Figure S5.** XRD spectra of SBA-15-SO<sub>3</sub>H-3 and the Reused-SBA-15-SO<sub>3</sub>H-3.

**Table S1.** Chromatographic conditions for the detection of organophosphorus pesticides.

| Instrument conditions  |                                                               |       |       |
|------------------------|---------------------------------------------------------------|-------|-------|
| Chromatographic column | ACQUITY UPLC® BEH C18 column (2.1 mm ×100 mm, 1.7 μm; Waters) |       |       |
| Column temperature     | 40°C                                                          |       |       |
| Injection volume       | 2 μL                                                          |       |       |
| Flow rate              | 0.3 mL/min                                                    |       |       |
| Mobile phase A         | 0.1% formic acid aqueous                                      |       |       |
| Mobile phase B         | ACN                                                           |       |       |
| Gradient elution       | Time (min)                                                    | A (%) | B (%) |
|                        | 0                                                             | 95%   | 5%    |
|                        | 1                                                             | 95%   | 5%    |
|                        | 3                                                             | 24%   | 76%   |
|                        | 6                                                             | 1%    | 99%   |
|                        | 9.1                                                           | 1%    | 99%   |
|                        | 9.6                                                           | 95%   | 5%    |
|                        | 11.5                                                          | 95%   | 5%    |

**Table S2.** The BET surface areas, pore volume and pore diameter of SBA-15, SBA-15-SO<sub>3</sub>H-1, SBA-15-SO<sub>3</sub>H-2 and SBA-15-SO<sub>3</sub>H-3.

| Sample                     | Surface area (m <sup>2</sup> /g) | Pore volume (cm <sup>3</sup> /g) | Pore diameter (nm) |
|----------------------------|----------------------------------|----------------------------------|--------------------|
| SBA-15                     | 643.06                           | 0.95                             | 5.79               |
| SBA-15-SO <sub>3</sub> H-1 | 147.90                           | 0.23                             | 5.29               |
| SBA-15-SO <sub>3</sub> H-2 | 100.08                           | 0.15                             | 5.07               |
| SBA-15-SO <sub>3</sub> H-3 | 259.93                           | 0.34                             | 5.08               |

**Table S3.** Analyze the contamination levels ( $\mu\text{g}/\text{kg}$ ) of thirty organophosphate pesticides in food samples.

| Sample       | No. | Malathion | Profenofos | Triazophos | Phoxim | Others |
|--------------|-----|-----------|------------|------------|--------|--------|
| Apple juice  | 1   | ND        | ND         | ND         | ND     | ND     |
|              | 2   | ND        | ND         | ND         | ND     | ND     |
|              | 3   | ND        | ND         | ND         | ND     | ND     |
|              | 4   | ND        | ND         | ND         | ND     | ND     |
|              | 5   | ND        | ND         | ND         | ND     | ND     |
| Grape juice  | 1   | ND        | ND         | ND         | ND     | ND     |
|              | 2   | ND        | ND         | ND         | ND     | ND     |
|              | 3   | ND        | ND         | ND         | ND     | ND     |
|              | 4   | ND        | ND         | ND         | ND     | ND     |
|              | 5   | ND        | ND         | ND         | ND     | ND     |
| Strawberries | 1   | ND        | 14.47      | ND         | ND     | ND     |
|              | 2   | 34.65     | ND         | 1.67       | ND     | ND     |
|              | 3   | ND        | ND         | ND         | ND     | ND     |
|              | 4   | ND        | ND         | ND         | ND     | ND     |
|              | 5   | 44.21     | 10.03      | 2.11       | ND     | ND     |
| Onions       | 1   | ND        | ND         | ND         | ND     | ND     |
|              | 2   | 45.23     | ND         | ND         | ND     | ND     |
|              | 3   | ND        | 9.91       | 4.21       | ND     | ND     |
|              | 4   | 49.11     | 8.85       | 3.23       | ND     | ND     |
|              | 5   | ND        | ND         | ND         | ND     | ND     |
| Cabbage      | 1   | ND        | ND         | ND         | 9.75   | ND     |
|              | 2   | ND        | ND         | 21.1       | 9.08   | ND     |
|              | 3   | 55.24     | ND         | ND         | 8.86   | ND     |
|              | 4   | ND        | 19.28      | ND         | 5.70   | ND     |
|              | 5   | ND        | ND         | ND         | ND     | ND     |

ND, not detected.
